# Supplementary material
Source: publisher figshare collection journal article supplement (https://acs.figshare.com/ndownloader/files/4204381)
Supplement: Supplementary file 1 [file 4204381]

## VI. Supporting information available

Here we show the calculated energies and voltages for various hydrogen-adsorbed surface configurations on RuO<sub>2</sub>(110). This information is available free of charge via the Internet at <http://pubs.acs.org>.

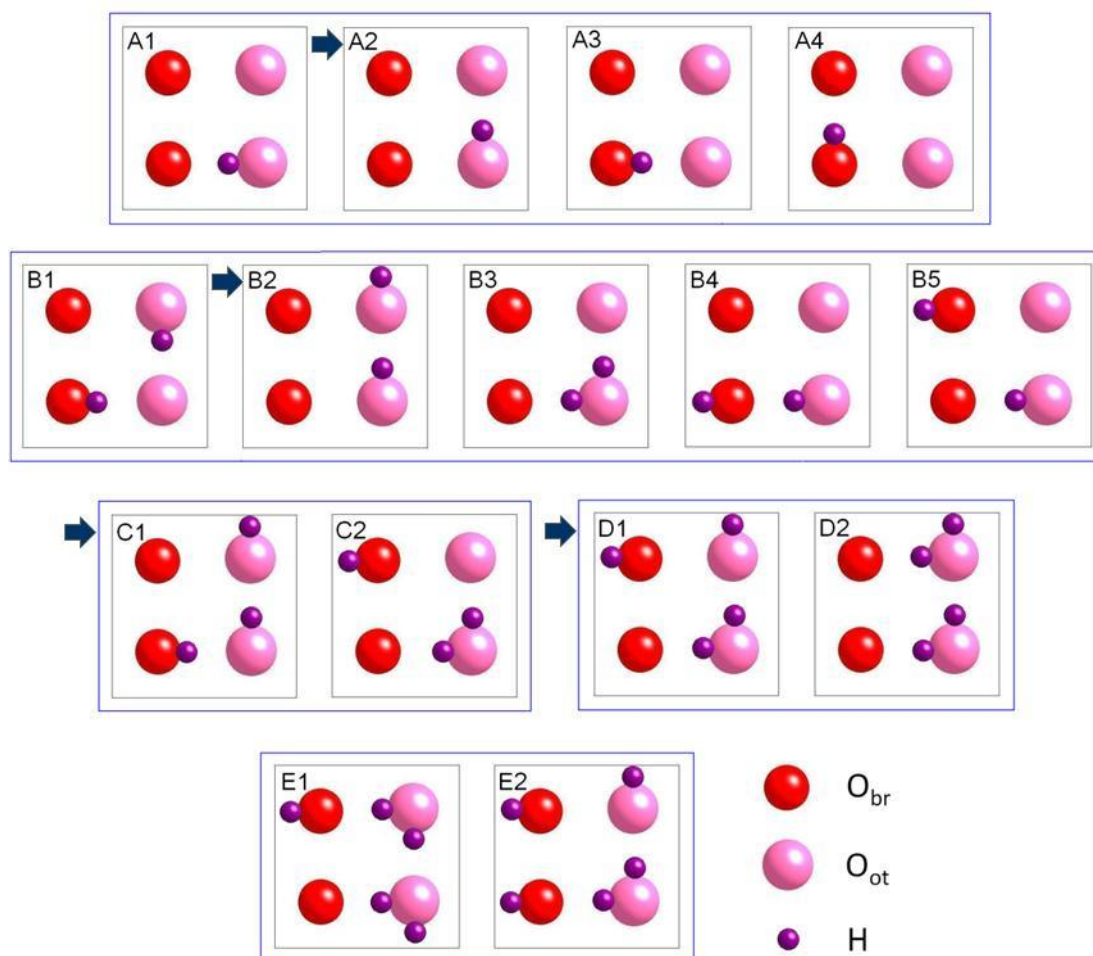

**Figure 9.** Top view of the 2×1 surface unit cell of the selected surface adsorption configurations categorized by the coverage of protons. The red sphere illustrates the bridge-oxygen, the big pink sphere is the on-top oxygen, and the little purple sphere is the proton. The arrow indicates the ground state structure of each coverage category.

**Table 3.** Adsorption energies calculated through static energies [ $E_{\text{adsorption}}(\text{eV}/\text{H}_2)$ ] or free energies [ $G_{\text{adsorption}}(\text{eV}/\text{H}_2)$ ], as well as voltages of H-complexes on oxygen covered  $\text{RuO}_2(110)$  as determined by DFT calculations.

| Structure       | Number of protons | $G_{\text{adsorption}}(\text{eV}/\text{H}_2)$ | Voltage (vs.RHE) | $E_{\text{adsorption}}(\text{eV}/\text{H}_2)$ | $E_{\text{adsorption}}$ (literature) |
|-----------------|-------------------|-----------------------------------------------|------------------|-----------------------------------------------|--------------------------------------|
| A1              | 1                 | 2.33                                          |                  | 2.93                                          |                                      |
| A2              | 1                 | 2.49                                          | 1.25             | 3.09                                          |                                      |
| A3              | 1                 | 2.27                                          |                  | 2.87                                          |                                      |
| A4              | 1                 | 1.95                                          |                  | 2.55                                          |                                      |
| B1              | 2                 | 2.34                                          |                  | 2.94                                          | 2.94 <sup>24</sup>                   |
| B2              | 2                 | 2.57                                          | 1.33             | 3.17                                          | 3.21 <sup>24</sup>                   |
| B3              | 2                 | 2.54                                          |                  | 3.14                                          |                                      |
| B4              | 2                 | 2.5                                           |                  | 3.1                                           |                                      |
| B5              | 2                 | 2.26                                          |                  | 2.86                                          | 2.91 <sup>24</sup>                   |
| C1              | 3                 | 2.55                                          | 1.27             | 3.15                                          |                                      |
| C2              | 3                 | 2.36                                          |                  | 2.96                                          |                                      |
| D1              | 4                 | 2.49                                          | 1.22             | 3.09                                          |                                      |
| D2              | 4                 | 2.38                                          |                  | 2.98                                          |                                      |
| E1              | 5                 | 1.9                                           |                  | 2.5                                           |                                      |
| E2              | 5                 | 1.98                                          |                  | 2.58                                          |                                      |
| E3 (subsurface) | 5                 | 2.46                                          | 1.21             | 3.06                                          |                                      |
